# Supplementary material for: Pressure support versus continuous positive airway pressure for predicting successful liberation from invasive ventilation in children: an open label, randomized non-inferiority trial
Source: PubMed Central journal article supplement (PMC10363498; doi:10.1016/j.lansea.2023.100219), 2023-05-29
Supplement: mmc2.pdf [file mmc2.pdf]

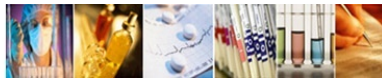

Clinical Trial Details (PDF Generation Date :- Fri, 12 May 2023 07:21:36 GMT)

|                                                                                            |                                                                                                                                                   |                                                                                                                                     |
|--------------------------------------------------------------------------------------------|---------------------------------------------------------------------------------------------------------------------------------------------------|-------------------------------------------------------------------------------------------------------------------------------------|
| <b>CTRI Number</b>                                                                         | CTRI/2019/12/022328 [Registered on: 12/12/2019] - <b>Trial Registered Prospectively</b>                                                           |                                                                                                                                     |
| <b>Last Modified On</b>                                                                    | 11/12/2019                                                                                                                                        |                                                                                                                                     |
| <b>Post Graduate Thesis</b>                                                                | Yes                                                                                                                                               |                                                                                                                                     |
| <b>Type of Trial</b>                                                                       | Interventional                                                                                                                                    |                                                                                                                                     |
| <b>Type of Study</b>                                                                       | Other (Specify) [Ventilation weaning strategy]                                                                                                    |                                                                                                                                     |
| <b>Study Design</b>                                                                        | Randomized, Parallel Group, Active Controlled Trial                                                                                               |                                                                                                                                     |
| <b>Public Title of Study</b>                                                               | A RANDOMISED CONTROLLED TRIAL COMPARING TWO METHODS OF EXTUBATION READINESS TRIAL (CPAP AND PRESSURE SUPPORT) IN MECHANICALLY VENTILATED CHILDREN |                                                                                                                                     |
| <b>Scientific Title of Study</b>                                                           | PRESSURE SUPPORT VERSUS CPAP FOR EXTUBATION READINESS IN CHILDREN RECEIVING MECHANICAL VENTILATION: A RANDOMIZED CONTROLLED TRIAL                 |                                                                                                                                     |
| <b>Secondary IDs if Any</b>                                                                | <b>Secondary ID</b>                                                                                                                               | <b>Identifier</b>                                                                                                                   |
|                                                                                            | NIL                                                                                                                                               | NIL                                                                                                                                 |
| <b>Details of Principal Investigator or overall Trial Coordinator (multi-center study)</b> | <b>Details of Principal Investigator</b>                                                                                                          |                                                                                                                                     |
|                                                                                            | <b>Name</b>                                                                                                                                       | Karthi N                                                                                                                            |
|                                                                                            | <b>Designation</b>                                                                                                                                | Assistant Professor                                                                                                                 |
|                                                                                            | <b>Affiliation</b>                                                                                                                                | Postgraduate Institute of Medical Education and Research                                                                            |
|                                                                                            | <b>Address</b>                                                                                                                                    | Department of Paediatrics Advanced Paediatric Center PGIMER,<br>Sector 12 Chandigarh<br>Chandigarh<br>CHANDIGARH<br>160012<br>India |
|                                                                                            | <b>Phone</b>                                                                                                                                      | 9814376716                                                                                                                          |
|                                                                                            | <b>Fax</b>                                                                                                                                        |                                                                                                                                     |
|                                                                                            | <b>Email</b>                                                                                                                                      | ny.karthi@gmail.com                                                                                                                 |
| <b>Details Contact Person (Scientific Query)</b>                                           | <b>Details Contact Person (Scientific Query)</b>                                                                                                  |                                                                                                                                     |
|                                                                                            | <b>Name</b>                                                                                                                                       | Karthi N                                                                                                                            |
|                                                                                            | <b>Designation</b>                                                                                                                                | Assistant Professor                                                                                                                 |
|                                                                                            | <b>Affiliation</b>                                                                                                                                | Postgraduate Institute of Medical Education and Research                                                                            |
|                                                                                            | <b>Address</b>                                                                                                                                    | Department of Paediatrics Advanced Paediatric Center PGIMER,<br>Sector 12 Chandigarh<br>Chandigarh<br>CHANDIGARH<br>160012<br>India |
|                                                                                            | <b>Phone</b>                                                                                                                                      | 9814376716                                                                                                                          |
|                                                                                            | <b>Fax</b>                                                                                                                                        |                                                                                                                                     |
|                                                                                            | <b>Email</b>                                                                                                                                      | ny.karthi@gmail.com                                                                                                                 |
| <b>Details Contact Person (Public Query)</b>                                               | <b>Details Contact Person (Public Query)</b>                                                                                                      |                                                                                                                                     |
|                                                                                            | <b>Name</b>                                                                                                                                       | Vishwa CR                                                                                                                           |
|                                                                                            | <b>Designation</b>                                                                                                                                | Senior Resident                                                                                                                     |
|                                                                                            | <b>Affiliation</b>                                                                                                                                | Postgraduate Institute of Medical Education and Research                                                                            |
|                                                                                            | <b>Address</b>                                                                                                                                    | Department of Paediatrics Advanced Paediatric Center PGIMER,<br>Sector 12 Chandigarh<br>Chandigarh<br>CHANDIGARH<br>160012<br>India |

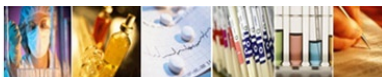

|                                               |                                               |                                                                                                                                                                                       |                                                                                                                                           |                                         |
|-----------------------------------------------|-----------------------------------------------|---------------------------------------------------------------------------------------------------------------------------------------------------------------------------------------|-------------------------------------------------------------------------------------------------------------------------------------------|-----------------------------------------|
|                                               | <b>Phone</b>                                  | 8800517848                                                                                                                                                                            |                                                                                                                                           |                                         |
|                                               | <b>Fax</b>                                    |                                                                                                                                                                                       |                                                                                                                                           |                                         |
|                                               | <b>Email</b>                                  | drvishwacr@gmail.com                                                                                                                                                                  |                                                                                                                                           |                                         |
| <b>Source of Monetary or Material Support</b> | <b>Source of Monetary or Material Support</b> |                                                                                                                                                                                       |                                                                                                                                           |                                         |
|                                               | > PGIMER, Chandigarh                          |                                                                                                                                                                                       |                                                                                                                                           |                                         |
| <b>Primary Sponsor</b>                        | <b>Primary Sponsor Details</b>                |                                                                                                                                                                                       |                                                                                                                                           |                                         |
|                                               | <b>Name</b>                                   | PGIMER Chandigarh                                                                                                                                                                     |                                                                                                                                           |                                         |
|                                               | <b>Address</b>                                | PGIMER, Sector 12, Chandigarh, 160012                                                                                                                                                 |                                                                                                                                           |                                         |
|                                               | <b>Type of Sponsor</b>                        | Research institution and hospital                                                                                                                                                     |                                                                                                                                           |                                         |
| <b>Details of Secondary Sponsor</b>           | <b>Name</b>                                   | <b>Address</b>                                                                                                                                                                        |                                                                                                                                           |                                         |
|                                               | NIL                                           | NIL                                                                                                                                                                                   |                                                                                                                                           |                                         |
| <b>Countries of Recruitment</b>               | <b>List of Countries</b>                      |                                                                                                                                                                                       |                                                                                                                                           |                                         |
|                                               | India                                         |                                                                                                                                                                                       |                                                                                                                                           |                                         |
| <b>Sites of Study</b>                         | <b>Name of Principal Investigator</b>         | <b>Name of Site</b>                                                                                                                                                                   | <b>Site Address</b>                                                                                                                       | <b>Phone/Fax/Email</b>                  |
|                                               | Vishwa CR                                     | Postgraduate Institute of Medical Sciences and Research, Chandigarh                                                                                                                   | Department of Paediatric Critical Care, Paediatric Department Office, 3rd Floor, Advanced Paediatric Center, PGIMER Chandigarh CHANDIGARH | 8800517848<br>drvishwacr@gmail.com      |
| <b>Details of Ethics Committee</b>            | <b>Name of Committee</b>                      | <b>Approval Status</b>                                                                                                                                                                | <b>Date of Approval</b>                                                                                                                   | <b>Is Independent Ethics Committee?</b> |
|                                               | INSTITUTE ETHICS COMMITTEE                    | Approved                                                                                                                                                                              | 14/11/2019                                                                                                                                | No                                      |
| <b>Regulatory Clearance Status from DCGI</b>  | <b>Status</b>                                 |                                                                                                                                                                                       | <b>Date</b>                                                                                                                               |                                         |
|                                               | Not Applicable                                |                                                                                                                                                                                       | No Date Specified                                                                                                                         |                                         |
| <b>Health Condition / Problems Studied</b>    | <b>Health Type</b>                            |                                                                                                                                                                                       | <b>Condition</b>                                                                                                                          |                                         |
|                                               | Patients                                      |                                                                                                                                                                                       | Diseases of the respiratory system                                                                                                        |                                         |
| <b>Intervention / Comparator Agent</b>        | <b>Type</b>                                   | <b>Name</b>                                                                                                                                                                           | <b>Details</b>                                                                                                                            |                                         |
|                                               | Intervention                                  | Pressure Support                                                                                                                                                                      | A mode used for extubation readiness test - 2 hours                                                                                       |                                         |
|                                               | Comparator Agent                              | CPAP                                                                                                                                                                                  | A mode used for extubation readiness test - 2 hours                                                                                       |                                         |
| <b>Inclusion Criteria</b>                     | <b>Inclusion Criteria</b>                     |                                                                                                                                                                                       |                                                                                                                                           |                                         |
|                                               | <b>Age From</b>                               | 1.00 Month(s)                                                                                                                                                                         |                                                                                                                                           |                                         |
|                                               | <b>Age To</b>                                 | 12.00 Year(s)                                                                                                                                                                         |                                                                                                                                           |                                         |
|                                               | <b>Gender</b>                                 | Both                                                                                                                                                                                  |                                                                                                                                           |                                         |
|                                               | <b>Details</b>                                | 1. Children aged 12 years or younger and receiving mechanical ventilation at least for 48 hours <br/> 2. Informed written consent<br/>                                                |                                                                                                                                           |                                         |
| <b>Exclusion Criteria</b>                     | <b>Exclusion Criteria</b>                     |                                                                                                                                                                                       |                                                                                                                                           |                                         |
|                                               | <b>Details</b>                                | 1. Procedural or short term intubation<br>2. End of life care<br>3. Neuromuscular disorders requiring slow or customised weaning plan<br>4. Prolonged mechanical ventilation >4 weeks |                                                                                                                                           |                                         |



|                                             |                                                                                                                                                                                                                                                                                                                                                                                              |                          |
|---------------------------------------------|----------------------------------------------------------------------------------------------------------------------------------------------------------------------------------------------------------------------------------------------------------------------------------------------------------------------------------------------------------------------------------------------|--------------------------|
| <b>Method of Generating Random Sequence</b> | Computer generated randomization                                                                                                                                                                                                                                                                                                                                                             |                          |
| <b>Method of Concealment</b>                | Sequentially numbered, sealed, opaque envelopes                                                                                                                                                                                                                                                                                                                                              |                          |
| <b>Blinding/Masking</b>                     | Outcome Assessor Blinded                                                                                                                                                                                                                                                                                                                                                                     |                          |
| <b>Primary Outcome</b>                      | <b>Outcome</b>                                                                                                                                                                                                                                                                                                                                                                               | <b>Timepoints</b>        |
|                                             | Successful extubation after first extubation readiness test                                                                                                                                                                                                                                                                                                                                  | 72 hours post extubation |
| <b>Secondary Outcome</b>                    | <b>Outcome</b>                                                                                                                                                                                                                                                                                                                                                                               | <b>Timepoints</b>        |
|                                             | Rate of re-intubation                                                                                                                                                                                                                                                                                                                                                                        | 72 hours post extubation |
|                                             | Need for post extubation NIV                                                                                                                                                                                                                                                                                                                                                                 | 72 hours post extubation |
|                                             | Ventilation free days                                                                                                                                                                                                                                                                                                                                                                        | Till discharge from PICU |
|                                             | Length of PICU stay                                                                                                                                                                                                                                                                                                                                                                          | Till discharge from PICU |
| <b>Target Sample Size</b>                   | <b>Total Sample Size=244</b><br><b>Sample Size from India=244</b><br><b>Final Enrollment numbers achieved (Total)=Applicable only for Completed/Terminated trials</b><br><b>Final Enrollment numbers achieved (India)=Applicable only for Completed/Terminated trials</b>                                                                                                                    |                          |
| <b>Phase of Trial</b>                       | N/A                                                                                                                                                                                                                                                                                                                                                                                          |                          |
| <b>Date of First Enrollment (India)</b>     | 12/12/2019                                                                                                                                                                                                                                                                                                                                                                                   |                          |
| <b>Date of First Enrollment (Global)</b>    | No Date Specified                                                                                                                                                                                                                                                                                                                                                                            |                          |
| <b>Estimated Duration of Trial</b>          | <b>Years=2</b><br><b>Months=2</b><br><b>Days=0</b>                                                                                                                                                                                                                                                                                                                                           |                          |
| <b>Recruitment Status of Trial (Global)</b> | Not Applicable                                                                                                                                                                                                                                                                                                                                                                               |                          |
| <b>Recruitment Status of Trial (India)</b>  | Not Yet Recruiting                                                                                                                                                                                                                                                                                                                                                                           |                          |
| <b>Publication Details</b>                  | Nil                                                                                                                                                                                                                                                                                                                                                                                          |                          |
| <b>Brief Summary</b>                        | <p>This is a single centre randomised controlled study at a tertiary centre in North India. Children will be randomised to CPAP or Pressure support for extubation readiness trial. The primary outcome is rate of successful extubation after first ERT. Secondary outcomes include rate of re-intubation, need for post extubation NIV, ventilation free days and length of PICU stay.</p> |                          |
